# Supplementary material
Source: MDPI journal article supplement (https://www.mdpi.com/1424-2818/14/7/577)
Supplement: s1 [file s1]

Table S1: Genetic differences among different plant species used for cluster analysis.

|                      | P.vera       | P.<br>weinmannifolia | Rhus         | Anacardium   | Mangifera    | Spondias     | Commiphora   | Boswellia    | Litchi       | Sapindus     | Prunus       | Nicotiana | Leitneria | Citrus | Zantho<br>xylum | Swietenia | Khaya |
|----------------------|--------------|----------------------|--------------|--------------|--------------|--------------|--------------|--------------|--------------|--------------|--------------|-----------|-----------|--------|-----------------|-----------|-------|
| P.vera               | 0            |                      |              |              |              |              |              |              |              |              |              |           |           |        |                 |           |       |
| P.<br>weinmannifolia | 0.003        |                      |              |              |              |              |              |              |              |              |              |           |           |        |                 |           |       |
| Rhus                 | 0.011        | 0.011                |              |              |              |              |              |              |              |              |              |           |           |        |                 |           |       |
| Anacardium           | 0.015        | 0.015                | 0.021        |              |              |              |              |              |              |              |              |           |           |        |                 |           |       |
| Mangifera            | 0.027        | 0.026                | 0.033        | 0.026        |              |              |              |              |              |              |              |           |           |        |                 |           |       |
| Spondias             | 0.03         | 0.03                 | 0.037        | 0.032        | 0.044        |              |              |              |              |              |              |           |           |        |                 |           |       |
| Commiphora           | 0.043        | 0.042                | 0.049        | 0.045        | 0.057        | 0.04         |              |              |              |              |              |           |           |        |                 |           |       |
| Boswellia            | 0.04         | 0.04                 | 0.047        | 0.042        | 0.054        | 0.037        | 0.021        |              |              |              |              |           |           |        |                 |           |       |
| Litchi               | 0.052        | 0.052                | 0.058        | 0.054        | 0.066        | 0.049        | 0.055        | 0.052        |              |              |              |           |           |        |                 |           |       |
| Sapindus             | 0.054        | 0.053                | 0.06         | 0.056        | 0.067        | 0.051        | 0.056        | 0.054        | 0.013        |              |              |           |           |        |                 |           |       |
| Prunus               | <b>0.075</b> | <b>0.074</b>         | <b>0.081</b> | <b>0.077</b> | <b>0.089</b> | <b>0.072</b> | <b>0.077</b> | <b>0.075</b> | <b>0.08</b>  | <b>0.082</b> |              |           |           |        |                 |           |       |
| Nicotiana            | <b>0.085</b> | <b>0.085</b>         | <b>0.091</b> | <b>0.087</b> | <b>0.099</b> | <b>0.082</b> | <b>0.088</b> | <b>0.085</b> | <b>0.091</b> | <b>0.092</b> | <b>0.085</b> |           |           |        |                 |           |       |
| Leitneria            | 0.053        | 0.052                | 0.059        | 0.055        | 0.066        | 0.05         | 0.055        | 0.053        | 0.058        | 0.06         | 0.08         | 0.09      |           |        |                 |           |       |
| Citrus               | 0.058        | 0.058                | 0.064        | 0.06         | 0.072        | 0.055        | 0.061        | 0.058        | 0.064        | 0.065        | 0.085        | 0.095     | 0.053     |        |                 |           |       |
| Zanthoxylum          | 0.055        | 0.055                | 0.061        | 0.057        | 0.069        | 0.052        | 0.058        | 0.055        | 0.061        | 0.062        | 0.082        | 0.092     | 0.051     | 0.033  |                 |           |       |
| Swietenia            | 0.046        | 0.046                | 0.052        | 0.048        | 0.06         | 0.043        | 0.049        | 0.046        | 0.052        | 0.053        | 0.073        | 0.083     | 0.042     | 0.046  | 0.043           |           |       |
| Khaya                | 0.047        | 0.046                | 0.053        | 0.049        | 0.061        | 0.044        | 0.049        | 0.047        | 0.053        | 0.054        | 0.074        | 0.084     | 0.042     | 0.046  | 0.043           | 0.005     | 0     |
